# Supplementary material for: Novel Hits for N-Myristoyltransferase Inhibition Discovered by Docking-Based Screening
Source: MDPI journal article supplement (doi:10.3390/molecules27175478), 2022-08-26
Supplement: s1 [file s1]

# Novel Hits for N-Myristoyltransferase Inhibition Discovered by Docking-Based Screening

Danislav S. Spassov \*, Mariyana Atanasova and Irini Doytchinova

Department of Chemistry, Faculty of Pharmacy, Medical University of Sofia, 1000 Sofia, Bulgaria

\* Correspondence: dspassov@pharmfac.mu-sofia.bg

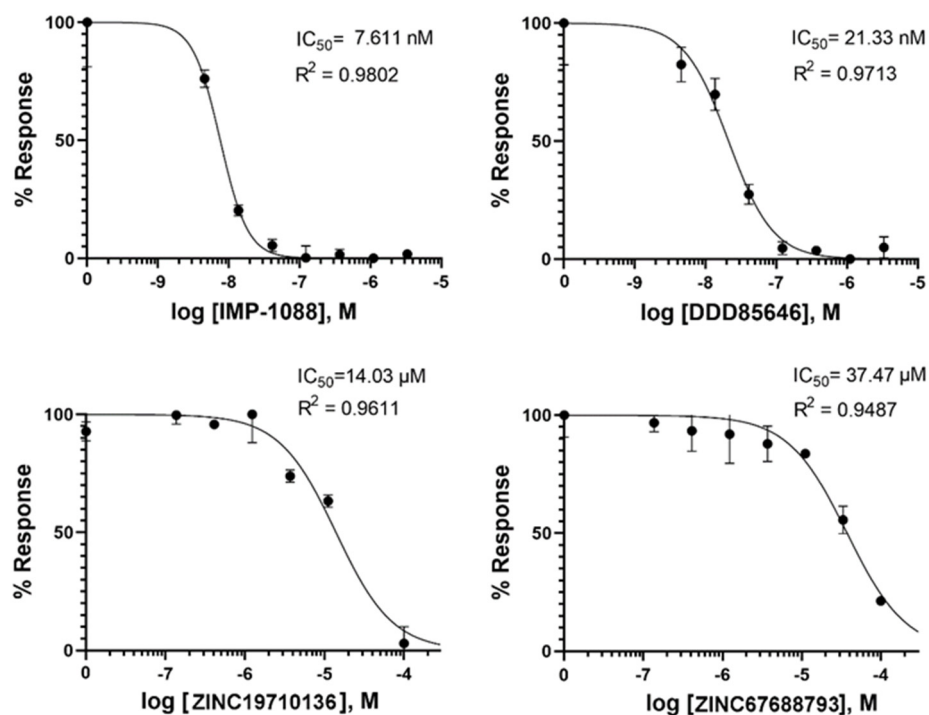

**Figure S1.** Dose response inhibitory curves and  $IC_{50}$  of selected compounds. The control NMT inhibitors are shown on the top row. At the bottom, two ligands- ZINC19710136 and ZINC67688793, identified by virtual screening are shown. These compounds form a salt bridge with C-terminus of NMT and were some of the most potent ligands tested. The experiments were performed in duplicates. Error bars represent SEM.

**Table S1.** ChemPLP scores of candidate compounds after docking with GOLD using crystal structure of human NMT1 (PDB 3IWE). The protein was set with flexible side chains. Three structural water molecules (HOH2, HOH760, HOH970) were also included in analysis. Autodock affinity scores are also shown for comparison.

|    | ZINC ID      | ChemPLP<br>GOLD | Affinity<br>Autodock<br>kcal/mol | Interaction with C-terminus of<br>NMT |
|----|--------------|-----------------|----------------------------------|---------------------------------------|
| 1  | ZINC19710084 | 120.37          | -11.4                            | Salt bridge                           |
| 2  | ZINC19691948 | 120.17          | -12.0                            | H-bond                                |
| 3  | ZINC19710136 | 119.73          | -11.6                            | Salt bridge                           |
| 4  | ZINC19710116 | 117.55          | -11.3                            | Salt bridge                           |
| 5  | ZINC19228549 | 117.52          | -11.9                            | None                                  |
| 6  | ZINC15080181 | 116.02          | -11.1                            | Salt bridge                           |
| 7  | ZINC19710117 | 115.26          | -11.3                            | Salt bridge                           |
| 8  | ZINC35451413 | 114.82          | -11.8                            | H-bond                                |
| 9  | ZINC21711800 | 113.94          | -11.3                            | Salt bridge                           |
| 10 | ZINC61997750 | 113.09          | -11.9                            | None                                  |

|     |               |        |       |             |
|-----|---------------|--------|-------|-------------|
| 11  | ZINC46055559  | 112.95 | -11.9 | H-bond      |
| 12  | ZINC35458799  | 112.31 | -11.3 | Salt bridge |
| 13  | ZINC19692196  | 111.64 | -11.8 | H-bond      |
| 14  | ZINC20600095  | 111.56 | -11.9 | None        |
| ctr | IMP-1088      | 111.36 | -10.8 | Salt bridge |
| 15  | ZINC19692195  | 110.28 | -12.0 | H-bond      |
| 16  | ZINC65111278  | 110.24 | -11.6 | None        |
| 17  | ZINC19590209  | 110.20 | -11.9 | Salt bridge |
| ctr | DDD86481      | 110.20 | -11.6 | Salt bridge |
| 18  | ZINC214463354 | 110.07 | -12.0 | Salt bridge |
| 19  | ZINC19781807  | 109.50 | -11.7 | None        |
| 20  | ZINC34830480  | 109.37 | -11.7 | None        |
| 21  | ZINC95642832  | 108.84 | -12.0 | None        |
| 22  | ZINC306129675 | 108.58 | -11.8 | None        |
| 23  | ZINC257281908 | 108.43 | -11.6 | H-bond      |
| 24  | ZINC19347015  | 108.35 | -11.6 | H-bond      |
| 25  | ZINC118915711 | 108.08 | -11.7 | Salt bridge |
| 26  | ZINC8992179   | 108.00 | -11.6 | None        |
| 27  | ZINC257217479 | 107.87 | -11.9 | None        |
| 28  | ZINC257333200 | 107.67 | -11.8 | None        |
| 29  | ZINC19376075  | 107.51 | -12.2 | H-bond      |
| 30  | ZINC257338200 | 107.46 | -11.7 | None        |
| 31  | ZINC15240419  | 107.44 | -11.7 | None        |
| 32  | ZINC61997749  | 107.33 | -11.8 | None        |
| 33  | ZINC257248718 | 107.29 | -11.9 | None        |
| 34  | ZINC61999344  | 107.07 | -11.8 | None        |
| 35  | ZINC299757951 | 106.95 | -11.5 | Salt bridge |
| 36  | ZINC3854978   | 106.67 | -11.7 | None        |
| 37  | ZINC19692188  | 106.62 | -11.6 | H-bond      |
| 38  | ZINC12047789  | 106.57 | -11.6 | None        |
| 39  | ZINC19372622  | 106.57 | -11.6 | H-bond      |
| 40  | ZINC19219257  | 106.55 | -11.6 | None        |
| 41  | ZINC3204340   | 106.21 | -11.6 | None        |
| 42  | ZINC72353749  | 106.19 | -11.7 | H-bond      |
| 43  | ZINC19376358  | 106.19 | -11.8 | None        |
| 44  | ZINC12552475  | 106.02 | -12.1 | None        |
| 45  | ZINC35459261  | 105.64 | -11.7 | Salt bridge |
| 46  | ZINC13563340  | 105.48 | -11.8 | None        |
| 47  | ZINC21887437  | 105.37 | -11.8 | None        |
| 48  | ZINC257297002 | 105.31 | -12.0 | H-bond      |
| 49  | ZINC257281890 | 105.18 | -11.6 | None        |
| 50  | ZINC19708540  | 105.16 | -11.2 | Salt bridge |
| 51  | ZINC257219852 | 105.05 | -11.9 | None        |
| 52  | ZINC19708539  | 104.95 | -11.5 | Salt bridge |
| 53  | ZINC21888194  | 104.85 | -11.9 | None        |
| 54  | ZINC9720915   | 104.49 | -11.1 | Salt bridge |
| 55  | ZINC72148663  | 104.39 | -11.6 | H-bond      |
| 56  | ZINC3218305   | 104.07 | -11.6 | None        |
| 57  | ZINC257256792 | 104.04 | -12.0 | None        |
| 58  | ZINC17012813  | 103.96 | -11.6 | None        |
| ctr | DDD85646      | 103.59 | -11.1 | Salt bridge |
| 59  | ZINC33252253  | 103.44 | -11.9 |             |
| 60  | ZINC299757953 | 103.35 | -11.3 | Salt bridge |

|     |               |        |       |             |
|-----|---------------|--------|-------|-------------|
| 61  | ZINC19708785  | 103.31 | -11.3 | Salt bridge |
| 62  | ZINC257322245 | 103.29 | -11.8 |             |
| 63  | ZINC8778846   | 102.33 | -11.6 |             |
| 64  | ZINC72370170  | 102.19 | -11.5 | Salt bridge |
| 65  | ZINC19710924  | 102.12 | -11.4 | Salt bridge |
| 66  | ZINC35442574  | 102.09 | -11.6 |             |
| 67  | ZINC17012816  | 102.04 | -11.8 |             |
| 68  | ZINC65074799  | 101.96 | -11.8 |             |
| 69  | ZINC8300432   | 101.73 | -11.6 |             |
| 70  | ZINC257320257 | 101.54 | -11.9 |             |
| 71  | ZINC118915712 | 101.39 | -11.5 | Salt bridge |
| 72  | ZINC19708784  | 101.21 | -11.6 |             |
| 73  | ZINC8300732   | 101.12 | -11.6 |             |
| 74  | ZINC19017615  | 101.04 | -11.6 |             |
| 75  | ZINC65074799  | 100.91 | -11.7 |             |
| 76  | ZINC8300419   | 100.87 | -12.4 |             |
| 77  | ZINC13959832  | 100.60 | -11.7 |             |
| 78  | ZINC65074790  | 100.40 | -11.6 |             |
| 79  | ZINC230007592 | 100.36 | -11.6 |             |
| 80  | ZINC8300441   | 100.29 | -11.6 |             |
| 81  | ZINC19347017  | 100.07 | -11.9 |             |
| 82  | ZINC257286683 | 100.05 | -11.6 |             |
| 83  | ZINC65074789  | 100.01 | -11.6 |             |
| 84  | ZINC72370169  | 98.92  | -11.5 | Salt bridge |
| 85  | ZINC2932864   | 98.78  | -11.6 |             |
| 86  | ZINC21881924  | 98.41  | -11.6 |             |
| 87  | ZINC67688793  | 98.10  | -11.4 | Salt bridge |
| 88  | ZINC72398680  | 98.01  | -11.3 | Salt bridge |
| 89  | ZINC19219255  | 97.86  | -11.6 |             |
| 90  | ZINC8932149   | 97.86  | -11.8 |             |
| 91  | ZINC20079488  | 97.75  | -11.6 |             |
| 92  | ZINC95354718  | 97.42  | -11.1 | Salt bridge |
| 93  | ZINC253504901 | 97.29  | -11.7 |             |
| 94  | ZINC19590228  | 96.79  | -11.4 | Salt bridge |
| 95  | ZINC15064086  | 96.62  | -11.7 |             |
| 96  | ZINC67688794  | 96.57  | -11.2 | Salt bridge |
| 97  | ZINC257282320 | 96.45  | -11.7 |             |
| 98  | ZINC19374862  | 96.12  | -11.5 | Salt bridge |
| 99  | ZINC32964503  | 95.97  | -11.6 |             |
| 100 | ZINC19941465  | 95.86  | -11.6 |             |
| 101 | ZINC8300421   | 95.32  | -11.9 |             |
| 102 | ZINC19590227  | 95.26  | -11.6 |             |
| 103 | ZINC8694642   | 94.93  | -11.8 |             |
| 104 | ZINC19566088  | 94.50  | -11.1 | Salt bridge |
| 105 | ZINC82170861  | 92.97  | -11.7 |             |
| 106 | ZINC91645187  | 92.93  | -11.6 |             |
| 107 | ZINC7738309   | 88.05  | -11.6 |             |

---
